# Supplementary material for: Ants Can Anticipate the Following Quantity in an Arithmetic Sequence
Source: MDPI journal article supplement (doi:10.3390/bs11020018), 2021-01-28
Supplement: s1 [file s1]

## Supplementary Materials

Figure S1 illustrates the Experiment I, Figure S2 illustrates the Experiment 2.

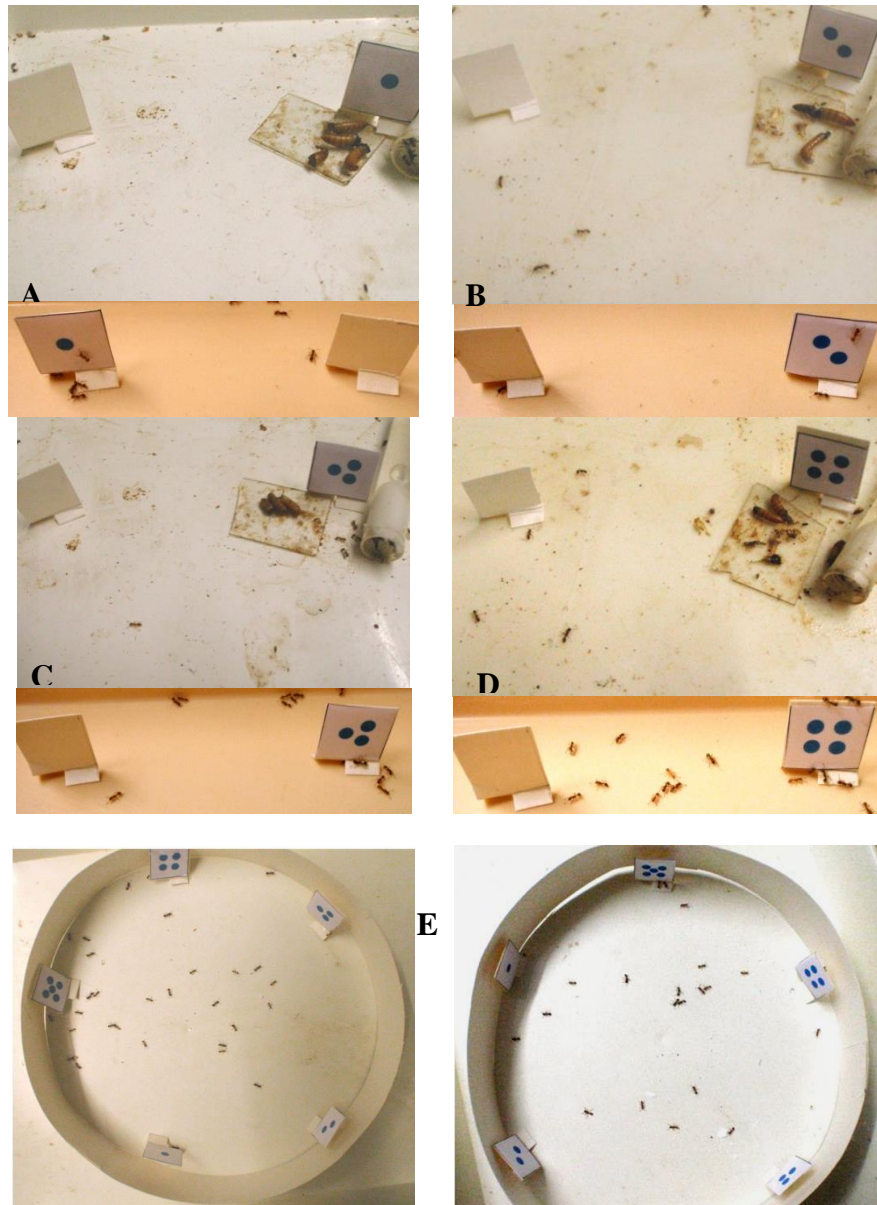

**Figure S1.** Views of experiments made for examining if ants could anticipate the following number of blue circles in an increasing sequence of 1 to 4 blue circles. **A, B, C, D:** successive training to (upper photos) and testing faced with (lower photos) respectively 1, 2, 3, 4 blue circles *versus* 0 circle. **E:** testing ants of the two colonies in front of 1, 2, 3, 4 and 5 blue circles simultaneous presented in a circular enclosure. They showed a preference for the 5 circles, having thus expected what would be the following number in the increasing sequence.

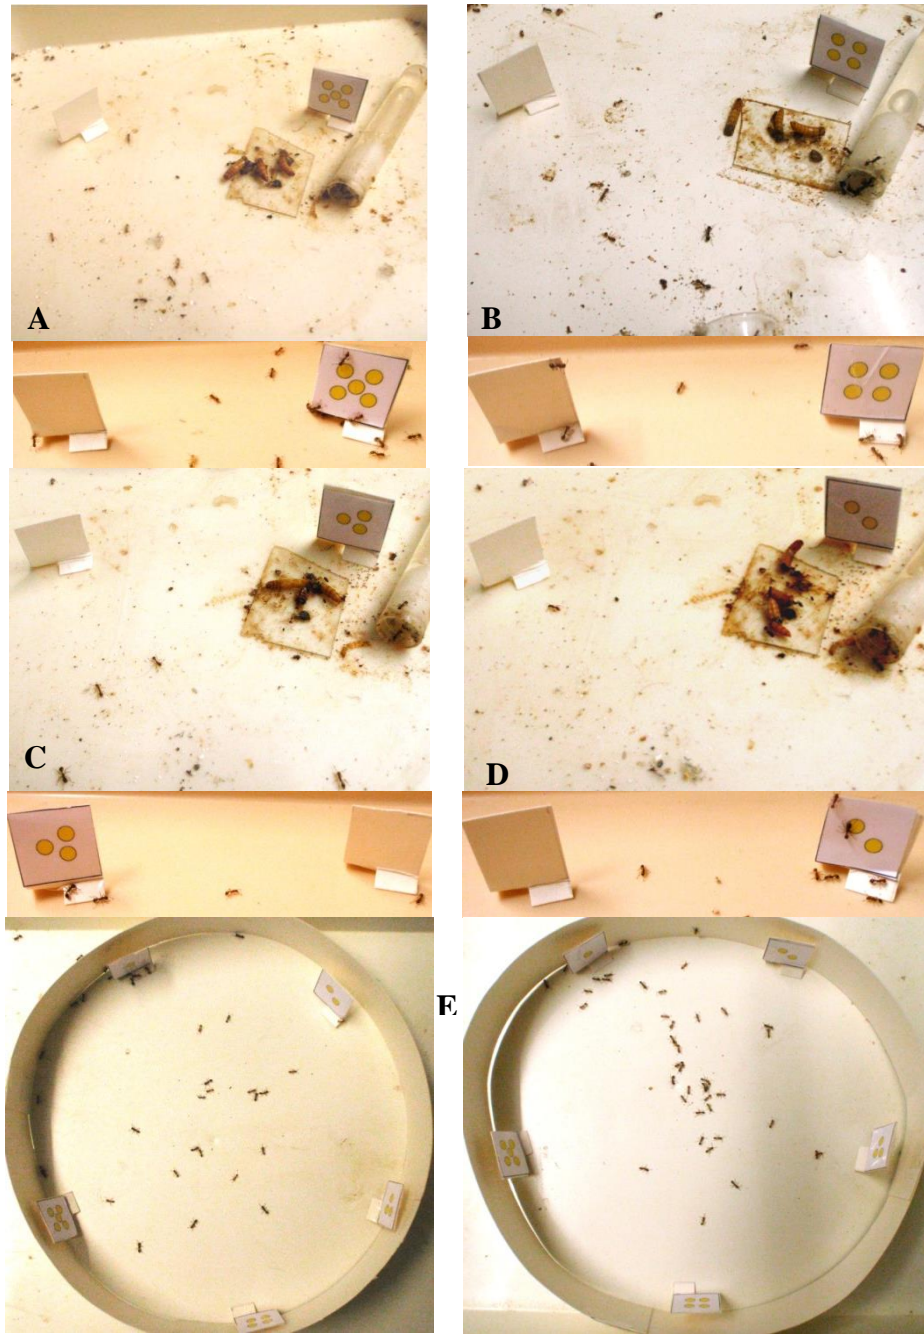

**Figure S2.** Views of experiments made for examining if ants could anticipate the following number in a decreasing sequence of 5 to 2 yellow circles. **A, B, C, D:** successive training to (upper photo) and testing faced with (lower photo) respectively 5, 4, 3, 2 yellow circles *versus* 0 circle. **E:** testing ants of the two colonies in front of 1, 2, 3, 4 and 5 yellow circles simultaneous presented in a circular enclosure. They went mostly to the 1 circle, having thus expected what would be the following number in the decreasing sequence.
